# Supplementary material
Source: PubMed Central journal article supplement (PMC3989692)
Supplement: embr0015-0264-sd3.pdf [file embr0015-0264-sd3.pdf]

Raw Data

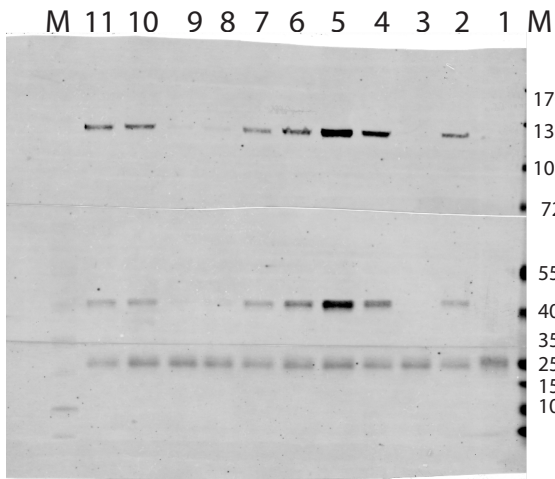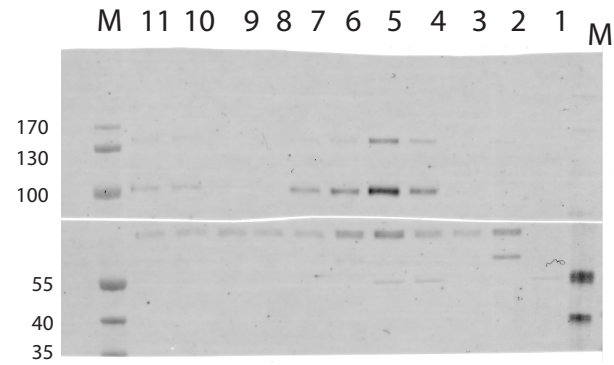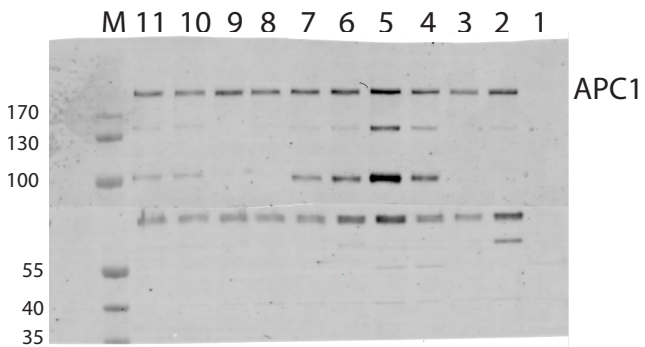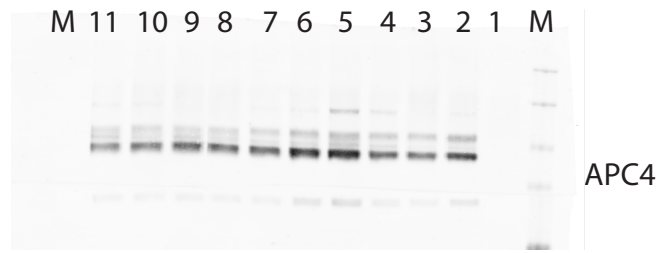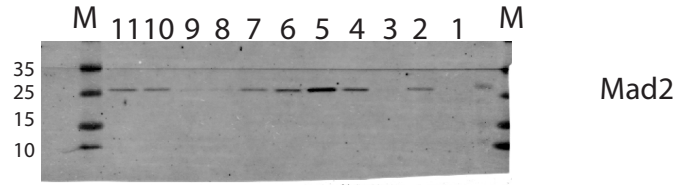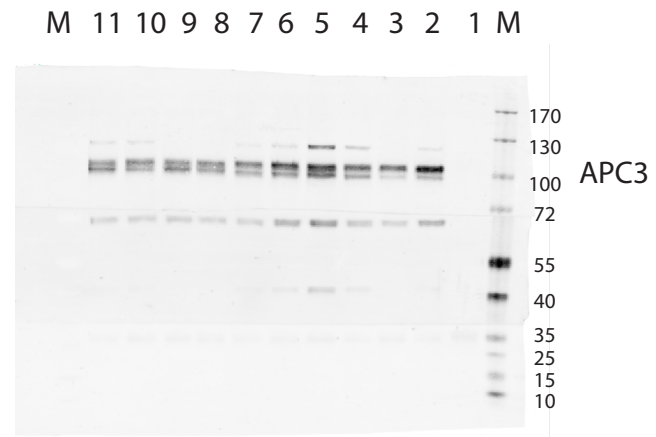

- 1 IgG
- 2 ctrl. siRNA
- 3 ctrl. Cdc20 siRNA
- 4 wt 0.5
- 5 wt 10
- 6 dC-Box 0.5
- 7 dC-Box 10
- 8 dC-Box/R499E 0.5
- 9 dC-Box/R499E 10
- 10 R499E 0.5
- 11 R499E 10
- M Marker (only clearly visible in 680 nm scanning)

Normalized data

E1

|              | Cdc20-YFP  | APC1       | Bub3       | BubR1      | Mad2       | APC3       |
|--------------|------------|------------|------------|------------|------------|------------|
| FRT Luci     | 0          | 1          | 1          | 1          | 1          | 1          |
| FRT Cdc20 KD | 0          | 0.74393541 | 0.04452407 | 0.03938646 | 0.1338202  | 0.74369137 |
| wt           | 1          | 1          | 1          | 1          | 1          | 1          |
| dC-Box       | 0.36630718 | 0.81006106 | 0.20940578 | 0.11072765 | 0.34306172 | 0.86444575 |
| dC-Box/R499E | 0.01576248 | 0.85378462 | 0.00836799 | 0.00267727 | 0.06422173 | 0.85277706 |
| R499E        | 0.2455371  | 0.99902977 | 0.26917059 | 0.29352469 | 0.61495129 | 1.37001599 |

E2

|              | Cdc20-YFP  | APC1       | Bub3       | BubR1      | Mad2       | APC3       |
|--------------|------------|------------|------------|------------|------------|------------|
| FRT Luci     | 0          | 1          | 1          | 1          | 1          | 1          |
| FRT Cdc20 KD | 0          | 1.04086693 | 0.0842709  | 0.27180618 | 0          | 0.95530071 |
| wt           | 1          | 1          | 1          | 1          | 1          | 1          |
| dC-Box       | 0.23425089 | 1.03974902 | 0.40132602 | 0.51643273 | 0.50128439 | 0.95674741 |
| dC-Box/R499E | 0.08080578 | 1.16105355 | 0.10934678 | 0.36722203 | 0.64422053 | 1.19869443 |
| R499E        | 0.10066193 | 1.10211778 | 0.1798854  | 0.84054215 | 0.87379907 | 1.05269496 |

E3

|              | Cdc20-YFP  | APC1       | Bub3       | BubR1      | Mad2       | APC3       |
|--------------|------------|------------|------------|------------|------------|------------|
| FRT Luci     | 0          | 1          | 1          | 1          | 1          | 1          |
| FRT Cdc20 KD | 0          | 0.93503898 | 0.09538656 | 0.06420586 | 0.20421393 | 0.93503898 |
| wt           | 1          | 1          | 1          | 1          | 1          | 1          |
| dC-Box       | 0.35054082 | 0.90858003 | 0.38891959 | 0.26214512 | 0.30965243 | 0.90858003 |
| dC-Box/R499E | 0          | 0.96379447 | 0.06061192 | 0.02357107 | 0.04058411 | 0.96379447 |
| R499E        | 0.10266169 | 1.06738795 | 0.27955441 | 0.18720568 | 0.19907944 | 1.06738795 |
