# Supplementary material
Source: PubMed Central journal article supplement (PMC3989692)
Supplement: embr0015-0264-sd7.pdf [file embr0015-0264-sd7.pdf]

A)

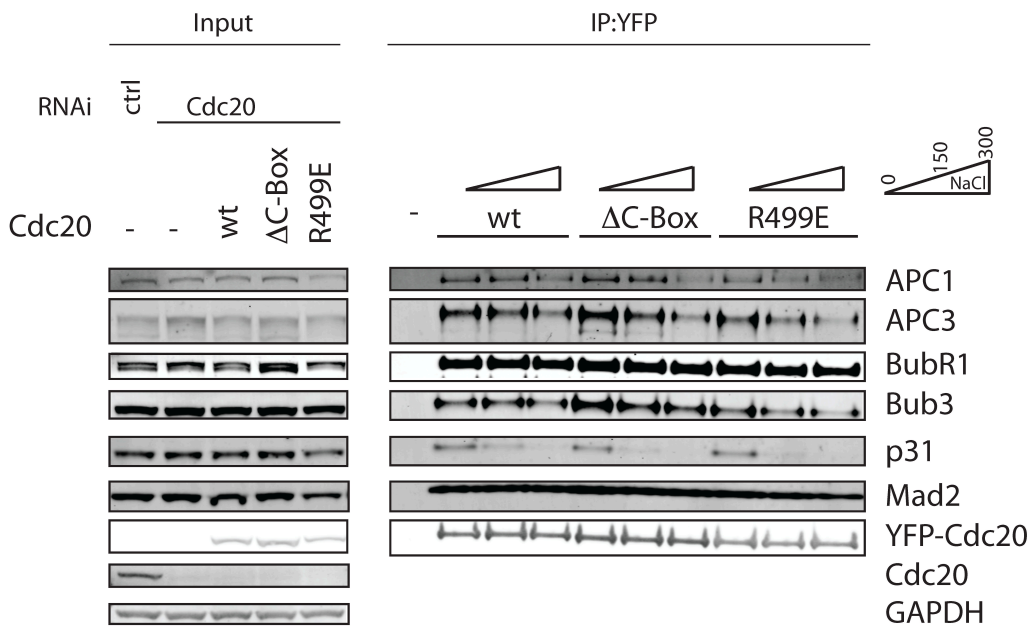

B)

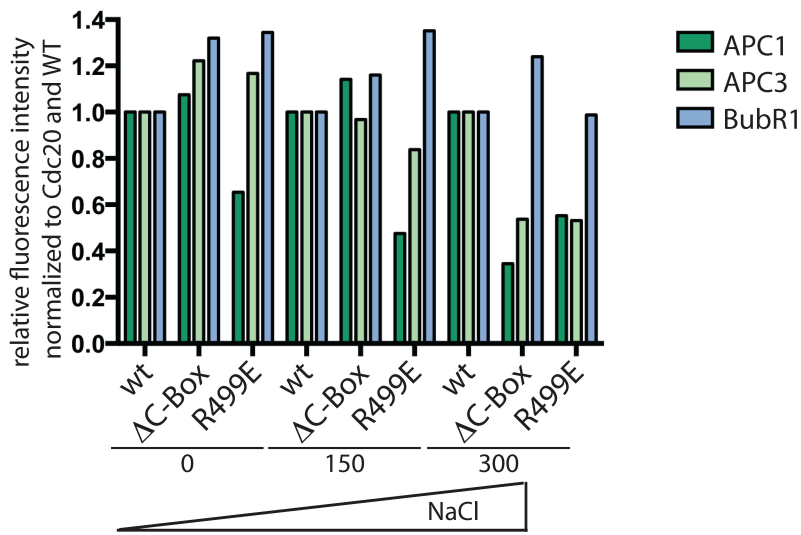

C)

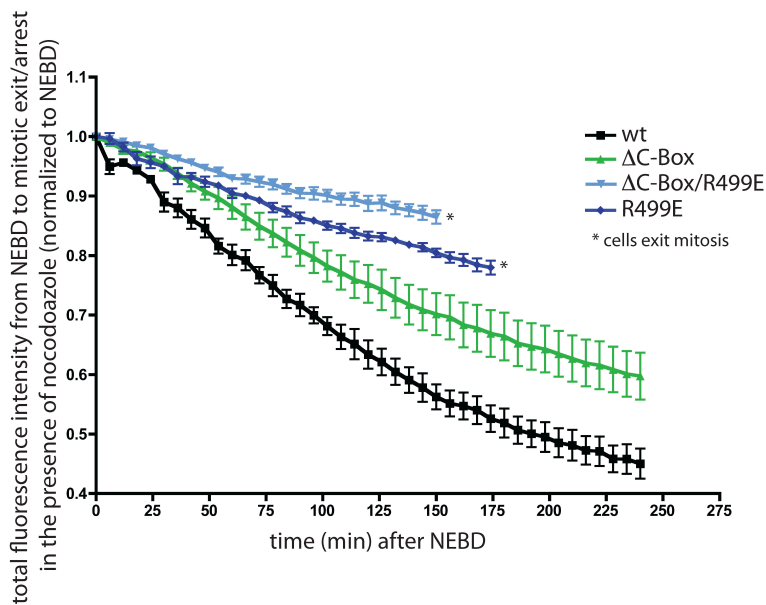

**Figure S2. The interaction between the MCC and the APC/C is sensitive to salt concentration.**

A) YFP-Cdc20 was purified from the indicated cell lines and washed with buffers containing 0, 150 or 300 mM NaCl and then analyzed by western blot for the association of the indicated proteins. B) Quantification of APC1, APC3 and BubR1 levels in the different YFP-Cdc20 constructs under the indicated salt conditions. C) Degradation of the indicated YFP-Cdc20 proteins during a nocodazole induced arrest in the presence of cycloheximide. The total fluorescence of the cell was determined and set to 1 at NEBD. 5 cells were analyzed per condition and the line represents the mean and the error bars the standard deviation.
